# Supplementary material for: Effectiveness of Universal School-Based Screening vs Targeted Screening for Major Depressive Disorder Among Adolescents: A Trial Protocol for the Screening in High Schools to Identify, Evaluate, and Lower Depression (SHIELD) Randomized Clinical Trial
Source: PubMed Central journal article supplement (PMC6827272; doi:10.1001/jamanetworkopen.2019.14427), 2019-11-01
Supplement: jamanetwopen-2-e1914427-s001.pdf [file jamanetwopen-2-e1914427-s001.pdf]

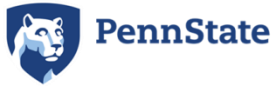

# HRP-591 - Protocol for Human Subject Research

## Protocol Title:

Randomized Controlled Trial of Universal vs. Targeted School Screening for Adolescent Major Depressive Disorder

## Principal Investigator:

Name: Deepa L. Sekhar  
Department: Pediatrics  
Telephone: 717-531-8006  
E-mail Address: dsekhar@pennstatehealth.psu.edu

## Version Date:

August 15, 2019

## Clinicaltrials.gov Registration #:

NCT03716869

## Important Instructions for Using This Protocol Template:

1. Add this completed protocol template to your study in CATS IRB (<http://irb.psu.edu>) on the “Basic Information” page, item 7.
2. This template is provided to help investigators prepare a protocol that includes the necessary information needed by the IRB to determine whether a study meets all applicable criteria for approval.
3. **Type your protocol responses below the gray instructional boxes of guidance language. If the section or item is not applicable, indicate not applicable.**
4. **For research being conducted at Penn State Hershey or by Penn State Hershey researchers only, delete the instructional boxes from the final version of the protocol prior to upload to CATS IRB (<http://irb.psu.edu>). For all other research, do not delete the instructional boxes from the final version of the protocol.**
5. When making revisions to this protocol as requested by the IRB, please follow the instructions outlined in the Study Submission Guide available in the Help Center in CATS IRB (<http://irb.psu.edu>) for using track changes.

### If you need help...

#### University Park and other campuses:

[Office for Research Protections Human Research Protection Program](#)

The 330 Building, Suite 205  
University Park, PA 16802-7014  
Phone: 814-865-1775  
Fax: 814-863-8699  
Email: [irb-orp@psu.edu](mailto:irb-orp@psu.edu)

#### College of Medicine and Hershey Medical Center:

[Human Subjects Protection Office](#)

90 Hope Drive, Mail Code A115, P.O. Box 855  
Hershey, PA 17033  
(Physical Office Location: Academic Support Building Room 1140)  
Phone: 717-531-5687  
Fax number: 717-531-3937  
Email: [irb-hspo@psu.edu](mailto:irb-hspo@psu.edu)

## Table of Contents

38 1.0 Objectives

39 2.0 Background

40 3.0 Inclusion and Exclusion Criteria

41 4.0 Recruitment Methods

42 5.0 Consent Process and Documentation

43 6.0 HIPAA Research Authorization and/or Waiver or Alteration of Authorization

44 7.0 Study Design and Procedures

45 8.0 Subject Numbers and Statistical Plan

46 9.0 Confidentiality, Privacy and Data Management

47 10.0 Data and Safety Monitoring Plan

48 11.0 Risks

49 12.0 Potential Benefits to Subjects and Others

50 13.0 Sharing Results with Subjects

51 14.0 Subject Stipend (Compensation) and/or Travel Reimbursements

52 15.0 Economic Burden to Subjects

53 16.0 Resources Available

54 17.0 Other Approvals

55 18.0 Multi-Site Research

56 19.0 Adverse Event Reporting

57 20.0 Study Monitoring, Auditing and Inspecting

58 21.0 Future Undetermined Research: Data and Specimen Banking

59 22.0 References

60

## 1.0 Objectives

### 1.1 Study Objectives

OBJECTIVE 1. Partnering with 16 PA public high schools (letters of commitment obtained for all 16 high schools) serving an estimated 17,400 predominantly minority, rural, urban, and/or low socioeconomic status (SES) students, we will conduct a randomized controlled trial, with student randomization by grade, to compare the effectiveness of universal school-based screening for adolescent major depressive disorder (MDD) versus the existing process of targeted screening based on concerning behavior.

- *Hypothesis 1: Universal screening will increase the number of adolescents with MDD screened, identified and engaged in treatment (MDD composite).*
- *Hypothesis 2 (Moderating): Universal screening will increase the historically poorer rates of MDD screening, identification and treatment engagement for females*
- *Hypothesis 3 (Moderating): Universal screening will increase the historically poorer rates of MDD screening, identification and treatment engagement for rural adolescents*

OBJECTIVE 2. Analyze the impact of MDD screening on secondary outcomes currently collected by the school's Student Assistance Program (SAP) and the school district. These data will be obtained in aggregate by grade level at each participating school (a total of 64 data points for each item; 4 grades x 16 schools, see note below re: PCORI).

- *Hypothesis 1. Standardized test scores (e.g. Keystone exams, PSAT, SAT, ACT) will improve in school populations with universal MDD screening secondary to earlier identification, treatment referral and engagement.*
- *Hypothesis 2. Student school policy violations and suspensions will remain unchanged among school populations with the universal MDD screening approach.*

Please note: We recently received funding from the Patient Centered Outcomes Research Institute (PCORI) for a complementary project to the one above. Aims for this HRSA study and the PCORI study have been adjusted with the permission of both organizations to be complementary but distinct. The PCORI project is in contract negotiations but will involve only urban school districts focusing on the effectiveness of MDD screening in minority populations (deleted objective #1, hypothesis #2 above) HRSA will remain focused on rural schools, which are primarily white (hence the rationale for removing objective #1, hypothesis #2). Secondary outcomes have similarly been adjusted to be complementary but distinct from each other. The study will be registered as one RCT in clinical trials.gov again with the approval of the funding organizations. The final analysis will involve both the HRSA and PCORI funded schools.

### 1.2 Primary Study Endpoints

MDD composite which includes MDD screen positive for the universal screening arm (or concern in the targeted screening group), MDD identification, and MDD treatment engagement. Each of the primary study endpoints will be collected at the individual level by the school district by the end of the school year. No identifiable information will be collected by study staff.

#### Universal Group

- 1) Adolescents with PHQ-9 score  $\geq 11$  (screen Sept-Nov of the school year) or who at any point in the year exhibit behavior concerning for MDD prompting a SAP triage request, 2) Adolescents identified with MDD by SAP triage, and 3) Adolescents who successfully engage with at least one SAP recommendation

#### Targeted Group

- 1) Adolescents with behavior concerning for MDD prompting a SAP triage request, 2) Adolescents identified with MDD by SAP triage, and 3) Adolescents who successfully engage with at least one SAP recommendation

112 Concern for MDD based on a primary or secondary potentially MDD related SAP "incoming referral  
113 reason"  
114

115  
116 SAP triage is not diagnostic, so MDD identified based on recommendations for MDD related school or  
117 community services (e.g. mental health treatment services)  
118

### 1.3 Secondary Study Endpoints

119  
120 The secondary endpoints listed below are individual level data points that will be obtained from the  
121 school district and/or SAP. No identifiable information will be collected by study staff.  
122

123  
124 MDD screen positive or MDD concern prompting Student Assistance Program triage  
125

126 Universal screening arm: Adolescents who have a PHQ-9 score  $\geq 11$  (screening with the PHQ-9 is  
127 planned for the fall of the academic year, e.g. September to November) or who at any point in  
128 the school year exhibit behavior concerning for MDD which prompts self or collateral request for  
129 SAP triage.  
130

131 Targeted screening arm: Adolescents with behavior concerning for MDD which prompts self or  
132 collateral request for SAP triage at any point during the school year.  
133

134 Suicidal adolescent (includes suicidal thoughts [positive response to PHQ-9 item 9], attempts and  
135 completed)  
136

137 Universal screening arm: Patient health questionnaire positive response to question #9 re: suicidal  
138 thoughts, which requires management by the state-mandated school crisis plan or student self  
139 or collateral report of suicidal thoughts, which requires management by the state-mandated  
140 school crisis plan (source school district).  
141

142 Targeted screening arm: Student self or collateral report of suicidal thoughts, which requires  
143 management by the state-mandated school crisis plan (source school district).  
144 Any student suicide attempts or completed suicides shared with the school district will also be  
145 included.  
146

147 MDD identification

148 Universal and targeted screening arms: Adolescents who are identified as having MDD based on  
149 triage by the school SAP team. As SAP triage is not diagnostic, MDD identified will be based on  
150 SAP recommendations for school or community services which are MDD related (e.g. mental  
151 health treatment services).  
152

153 MDD treatment engagement

154 Universal and targeted screening arms: Adolescents who successfully engage with at least one  
155 SAP recommendation. This may be fulfilled by parental report that an appointment was  
156 successfully scheduled  
157

158 The secondary endpoints listed below are aggregate data points by grade level that will be  
159 obtained from the school district and/or SAP. No identifiable information will be collected by  
160 study staff.

161 Standardized test scores (i.e. Keystone exams, PSAT, SAT/ACT)  
162 Student school policy violations and/or suspensions  
163 Missed school days

Grade point averages  
Grade advancement or graduation rates

Additional data points to be obtained for subgroup analyses include:

- At the individual level:
  - Sex - male or female
  - Ethnicity - Hispanic vs. non-Hispanic
  - Race - white, black or other
  - Urban/rural – students will be categorized as enrolled in urban or rural school districts based on the definition applied by The Center for Rural PA, a Legislative Agency of the PA General Assembly for the district
  
- At the aggregate level, the following variables will be collected:
  - District socioeconomic status
  - School size – school enrollment. Data will be obtained from school districts based on enrollment as of October 1 of the RCT
  - Ratio of guidance counselors/students – The ratio of counselors to students will be obtained from each school district
  - School-based mental health services – schools will be categorized by the availability of school-based mental health services (yes vs. no) based on information obtained from each school district.

We need to collect data at the individual level for 3 main reasons. First, we expect approximately 20% of students to opt out from the study, with opt out rates varying by grade. Aggregate data would necessarily include outcomes for students who are not enrolled in the study. This is particularly problematic for the universal screening group because students who opt out will not be offered the depression screening tool (PHQ-9). Second, we need to obtain gender and race/ethnicity to conduct important planned secondary analyses (subgroup analyses) that will examine efficacy of universal screening by these groups. In particular, we expect that females and minority students will have much higher rates of major depression disorder identified in the universal screening group. Third, in the universal screening group, we will be able to link responses to the PHQ-9 to outcomes, which will allow for estimation of important measures such as the false positive rate of the PHQ-9 (score  $\geq 11$ , but SAP process determines no further referrals are needed). These measures will inform decision-making regarding the potential for implementation of the intervention (in other schools) should the results of the trial ultimately show efficacy.

## 2.0 Background

### 2.1 Scientific Background and Gaps

The prevalence of annual major depressive disorder (MDD) episodes among US adolescents rose from 8.3% in 2008 to 12.5% in 2015.<sup>1</sup> Close to 30% of adolescents with MDD reported suicidality in the prior year, with more than one in ten making a suicide attempt.<sup>2</sup> As a result, suicide was the 2nd leading cause of death among youth 10-24 years of age as of 2014.<sup>3</sup> Baseline data from HealthyPeople.gov found that only 2.1% of adolescent primary care office visits included depression screening in the years 2005-2007.<sup>4</sup> Inequalities were reported for women who are three times more likely to have MDD, but

less likely to be treated than males.<sup>1,2,6</sup> In response to the growing mental health crisis, the US Preventive Services Task Force (USPSTF) endorsed universal screening for adolescent MDD in primary care in 2009.<sup>7,8</sup> The HealthyPeople.gov 2020 goal is a 10% increase in screening to a rate of 2.3%, which fails to address this adolescent public health crisis.<sup>4</sup> The USPSTF universal MDD screening recommendation was based on evidence that treatment of MDD is associated with moderate benefit.<sup>7,8</sup> While most experts in family medicine, pediatrics, psychology and child psychiatry agree that surveillance of adolescents at high-risk for MDD is warranted, the USPSTF updated their recommendations in 2016 with a call to address several knowledge gaps:

1) Does screening increase the proportion of adolescents identified with MDD?

2) What are the benefits and unintended consequences of MDD screening for subgroups: age, sex, race, ethnicity and socioeconomic status (SES)?

3) What are the benefits and unintended consequences of screening in nonclinical settings?<sup>8</sup>

We propose that schools may provide an effective setting to conduct universal MDD screening. While over half of US adolescents do not have annual preventive health visits most attend school.<sup>9</sup> The regular contact with schools compared to contact with the medical setting has been used to advocate for many school-based universal health screenings that impact academic success (e.g. vision, hearing). However, while current school screenings address multiple physical health domains, none address mental health.<sup>10</sup> Targeted mental health screening is the current school process for students who display signs concerning for MDD and results in referral to the school's Student Assistance Program (SAP). SAP operates in all 500 Pennsylvania school districts and functions similar to a triage service by assessing symptom severity, and then if appropriate, providing referrals to school or community-based mental health resources.<sup>11</sup> Students may self-refer, but all other SAP referrals depend upon a student exhibiting concerning behavior that is detected by school staff, peers or parents, which results in a targeted screening process with obvious limitations.

## 2.2 Previous Data

Our research team is acutely aware of the concerns the topic of adolescent depression screening may raise among school staff, providers, parents and adolescents. We have had ample opportunity in our pilot work to discuss and address many of these issues as outlined below. First, from April-Sept 2016 we conducted eight focus groups (7-10 participants each, n=62) to better understand the perspective of key stakeholders regarding Whole Child Health, specifically the importance of both physical and mental wellness. These focus groups included 2 parent groups, 2 school nurse groups, 2 groups of school teachers and administrators and 2 groups of medical providers (pediatrics and family medicine). The work was funded by the Penn State Social Science Research Institute-Children, Youth and Families Consortium. Participant conversations were instrumental in shaping the current proposal. In addition, following the aforementioned focus groups, we conducted a Community Engagement Studio in August 2017 funded by the Penn State Center for Translational Science Institute. These 2 hour sessions are specifically intended to inform grant proposals that depend upon successful community engagement. Participant perspectives ranged from adolescent to parent, school staff, the leaders of two mental health and suicide prevention organizations (Aevidum and the Jana Marie Foundation), a Behavioral Health Managed Care company representative and the project director of Pennsylvania's Garrett Lee Smith Youth Suicide Prevention Grant in addition to our Penn State Research team.

## 2.3 Study Rationale

Rates of major depression are rising among US adolescents paralleled by a rise in the rate of adolescent suicides. The most recent data indicates that 1 in 8 adolescents (12.5%) experienced an MDD episode in the past 12 months.<sup>1</sup> The most striking increase in MDD trends was for females across all racial and ethnic groups. Adolescent females demonstrated rates of MDD episodes over 3 times that of males (19.5% vs. 5.8%).<sup>1,6</sup> Some authors have suggested that adolescent females have increased exposure to depression risk factors including cyberbullying, mobile phone use and texting.<sup>6</sup> Along with the rise in MDD episodes, adolescent females have demonstrated a significant rise in emergency department visits

for nonfatal self-inflicted injuries with rates since 2009 increasing by 19% annually from 110 in 2009 to 318 per 100,000 in 2015.<sup>12</sup> Self-inflicted injury is one of the strongest risk factors for suicide, and the suicide rate for female adolescents reached its highest in the past 40 years according to 2017 Centers for Disease Control and Prevention data.<sup>13,14</sup>

Adolescent MDD has negative effects on academic performance, with increasing severity of depressive symptoms linked to a lower grade point average as well as subjective assessments of increased school workload and concentration difficulties. Adolescents with untreated MDD experience poorer interpersonal relationships, lower self-esteem, social isolation, and increased risk-taking behaviors including substance use, as well as multiple physical and mental health comorbidities in adulthood.<sup>7,8,15-17</sup> For 60-90% of adolescents, symptoms of a MDD episode may remit within in a year. The larger problem is that 50-75% of these adolescents will develop subsequent MDD episodes within 5 years, resulting a chronic or relapsing disorder.<sup>18</sup> Studies also suggest that recovery is not complete between episodes, with most individuals reporting residual symptoms or impairment.<sup>18</sup>

Despite the rising rates of depression, there has been no change in mental health treatment among adolescents with a MDD episode from 2005-2014.<sup>6</sup> Only 36-44% of children and adolescents with MDD receive treatment, underscoring that MDD is underdiagnosed and undertreated.<sup>6</sup> This disparity is especially pronounced for disadvantaged populations. Even for those who have a primary care provider, data from HealthyPeople.gov indicates a steady decline in rates of screening with only 1.4% of primary care office visits including MDD screening as of 2009- 2011.<sup>4</sup> In addition to minorities, rural youth and those of lower SES receive fewer preventive care services than their white, urban, high SES counterparts, further limiting their access to MDD screening in the context of well-care.<sup>20,21</sup>

## 3.0 Inclusion and Exclusion Criteria

### 3.1 Inclusion Criteria

Students in grades 9-12 at 16 public schools in Pennsylvania that previously committed to partner with us in this project. HRP-504- School Permission to Conduct Research forms will be uploaded in our CATS application documentation for each participating district to show district approval of the opt out procedure and to agree with their 3<sup>rd</sup> Party Protection of Pupil Rights Amendment (PPRA) policies.

School staff who assisted with the screener/screening process will be asked to complete a 45 minute interview using our feedback guide document (included in supporting documents).

### 3.2 Exclusion Criteria

Students whose parents complete the opt-out consent

Students not enrolled in one of the participating schools

Students not in grades 9-12

Students with disabilities that are deemed unable to participate by the school district

### 3.3 Early Withdrawal of Subjects

#### 3.3.1 Criteria for removal from study

N/A

#### 3.3.2 Follow-up for withdrawn subjects

N/A

## 4.0 Recruitment Methods

314 **4.1 Identification of subjects**

315 Three PA public schools committed to partner with us to complete the proposed work in the 2018-2019  
316 school year. Another 6 rural schools will participate in the 2019-2020 school year and this information  
317 will be submitted to the IRB in advance of the actual screening. PI Deepa Sekhar and co-investigator  
318 Jennifer Kraschnewski have previously partnered with several of these school districts through their  
319 prior research. In total, the rural schools serve approximately 3,900 students (HRSA Study) and were  
320 selected as they represent a large number of low SES, rural student populations who have known  
321 disparities in mental health services. The additional PCORI funded urban schools, adds an additional 13,  
322 400 students. Additionally, we will recruit 1-2 school staff members to participate in our feedback guide  
323 interview upon completion of the screener/screening process year. We are not collecting any PHI, nor  
324 will names of the school staff participants be disclosed in the use of manuscripts/ written publications.  
325

326 **4.2 Recruitment process**

327 After discussion with our stakeholders and the Penn State Institutional Review Board, we will pursue  
328 opt-out consent for screening given the importance of MDD screening and the low-risk aside from  
329 identification of a suicidal student. Parents will be informed of their child’s enrollment in screening and  
330 given the opportunity to opt out prior to the fall intervention. For this proposal, in cases of a shared  
331 custody agreement, if either parent or guardian opts out of the study, the student will be considered  
332 ineligible for enrollment. In this case, no information will be collected, even in the case of students  
333 randomized to the targeted screening arm, which is the usual school process. Also, any participating  
334 student randomized to the universal screening arm who does not assent at the time of screening will not  
335 be required to complete the screening form. Students 18 years and older are anticipated to be a small  
336 minority of the students at the start of the academic year, but they will also have the opportunity to opt  
337 out of study involvement if desired. We will be contacting our primary contacts from each of our  
338 participating districts to obtain implied/verbal consent for participating in our feedback guide  
339 interviews.  
340

341 **4.3 Recruitment materials**

342 No recruitment materials will be needed for this study. However, a letter will be sent home to parents to  
343 inform them of their child’s enrollment in the screening and given the opportunity to opt out prior to  
344 the intervention. If they do not wish to participate, parents will be asked to return the Opt-Out form in-  
345 person or by mail. Opt-out letters will be printed on district letterhead to include the participating  
346 school’s mailing address. Parents may also return the form signed and scanned, if the school decides to  
347 send the letter via email. A copy of the PHQ-9 questionnaire will be included in the letter sent to the  
348 parents. Additionally, the opt-out letter will be translated into a Spanish by the Department of Care  
349 Coordination and provided to each school.  
350

351 **4.4 Eligibility/screening of subjects**

352 N/A  
353

354 **5.0 Consent Process and Documentation**

355 **5.1 Consent Process**

356 **5.1.1 Obtaining Informed Consent**

357 **5.1.1.1 Timing and Location of Consent**

358 N/A

359 **5.1.1.2 Coercion or Undue Influence during Consent**

360 N/A  
361  
362  
363



364 **5.1.2 Waiver or alteration of the informed consent requirement**

365 We are requesting a waiver of the informed consent requirement. We are pursuing opt-out  
366 consent for screening given the important of MDD screening and the low-risk aside from  
367 identification of a suicidal student. At 14 years of age, PA youth are eligible to consent to mental  
368 health services without parental consent. Our use of the opt out is really intended to include  
369 and engage the parents and communities we are working with. The opt out will be a letter sent  
370 home to parents (either via email or regular mail as per school preference) giving them the  
371 option to decline participation for their student. Schools will be responsible for tracking students  
372 whose parents have opted-out. In addition, students in the universal arm will have the option to  
373 decline participation themselves on the screening day via the iPad handed to them. The first  
374 screen will describe PHQ-9; inform students that participation is voluntary; and participation  
375 may be stopped at any time and will not affect their school standing or grades.

376 We are requesting a waiver of informed consent by utilizing the HRP-585- HSPO Summary  
377 Explanation Research document for each of the staff members chosen from our participating  
378 districts to complete our interview using the Feedback Guide document.  
379

380  
381 **5.2 Consent Documentation**

382  
383 **5.2.1 Written Documentation of Consent**

384 N/A

385  
386 **5.2.2 Waiver of Documentation of Consent (Implied consent, Verbal consent, etc.)**

387 A summary explanation will be used to inform participants about the study allowing them to  
388 choose to participate in the study. They will provide us verbal consent. Staff members from two  
389 schools completed the Feedback Guide interview as a pilot to ensure the final version of the  
390 Feedback Guide was thorough and comprehensive. These staff members will receive the  
391 approved summary explanation, along with a copy of their completed feedback guide to ensure  
392 final consent.

393 **5.3 Consent – Other Considerations**

394  
395 **5.3.1 Non-English Speaking Subjects**

396 A Spanish translator was included in the grant and will join the research team for the MDD  
397 screening at schools where these services would be needed. In addition, the opt out information  
398 will be translated and sent in Spanish for those parents who the school indicates would have  
399 trouble with the English version forms. The assent will also be translated into Spanish for those  
400 students who indicate that Spanish is their preferred language. The PHQ-9 is already available in  
401 multiple languages including Spanish.  
402

403 **5.3.2 Cognitively Impaired Adults**

404 N/A

405 **5.3.2.1 Capability of Providing Consent**

406 N/A

407 **5.3.2.2 Adults Unable To Consent**

408 N/A

409 **5.3.2.3 Assent of Adults Unable to Consent**

410 N/A  
411  
412  
413

414 **5.3.3 Subjects who are not yet adults (infants, children, teenagers)**

415  
416 **5.3.3.1 Parental Permission**

417 We are requesting a waiver of informed consent. Rather, parents/guardians will  
418 receive an opt-out form. We are pursuing opt-out consent for screening given the  
419 important of MDD screening and the low-risk aside from identification of a suicidal  
420 student. At 14 years of age, PA youth are eligible to consent to mental health services  
421 without parental consent. Our use of the opt out is really intended to include and  
422 engage the parents and communities we are working with.

423 **5.3.3.2 Assent of subjects who are not yet adults**

424 Students in the universal arm will have the option to decline participation themselves  
425 on the screening day via the iPad handed to them. The first screen will describe PHQ-9;  
426 inform students that participation is voluntary; and participation may be stopped at  
427 any time and will not affect their school standing. The completion of the PHQ-9 implies  
428 a student's voluntary consent to participate in the research. Students who decide not  
429 to participate will not complete the PHQ-9, but will still be tracked similar to students  
430 randomized to the targeted screening arm. The study team will obtain their  
431 demographic information and the student will be followed through the academic year  
432 for SAP triage intakes initiated by the standard pathway (concern by teachers, nurse,  
433 parent, peer, or self-referral), any referrals and treatment engagement. No identifiable  
434 information will be obtained and it will be noted in study records that the student did  
435 not assent to participate in the MDD screener. A copy of this assent form is included in  
436 the consent form section.

437 **6.0 HIPAA Research Authorization and/or Waiver or Alteration of Authorization**

438  
439 **6.1 Authorization and/or Waiver or Alteration of Authorization for the Uses and Disclosures of PHI**

440  
441 **Check all that apply:**

- 442  **Not applicable, no identifiable protected health information (PHI) is accessed, used or**  
443 **disclosed in this study.** *[Mark all parts of sections 6.2 and 6.3 as not applicable]*
- 444  
445  **Authorization will be obtained and documented as part of the consent process.** *[If this is the*  
446 *only box checked, mark sections 6.2 and 6.3 as not applicable]*
- 447  
448  **Partial waiver is requested for recruitment purposes only (Check this box if patients' medical**  
449 **records will be accessed to determine eligibility before consent/authorization has been**  
450 **obtained).** *[Complete all parts of sections 6.2 and 6.3]*
- 451  
452  **Full waiver is requested for entire research study (e.g., medical record review studies).**  
453 *[Complete all parts of sections 6.2 and 6.3]*
- 454  
455  **Alteration is requested to waive requirement for written documentation of authorization**  
456 **(verbal authorization will be obtained).** *[Complete all parts of sections 6.2 and 6.3]*

457  
458 **6.2 Waiver or Alteration of Authorization for the Uses and Disclosures of PHI**

459  
460 **6.2.1 Access, use or disclosure of PHI representing no more than a minimal risk to the privacy of the**  
461 **individual**

463 **6.2.1.1 Plan to protect PHI from improper use or disclosure**

464 N/A

465 **6.2.1.2 Plan to destroy identifiers or a justification for retaining identifiers**

466 N/A

467 **6.2.2 Explanation for why the research could not practicably be conducted without access to and**  
468 **use of PHI**

469 N/A

470 **6.2.3 Explanation for why the research could not practicably be conducted without the waiver or**  
471 **alteration of authorization**

472 N/A

473 **6.3 Waiver or alteration of authorization statements of agreement**

474 N/A

475 **7.0 Study Design and Procedures**

476 **7.1 Study Design**

477 Due to the timeline for this funding opportunity, with an anticipated July 2018 start, 3 schools will  
478 engage in the randomized control trial (RCT) in study year 1 and the additional 13 schools in study year  
479 2. Many large scale randomized control trials do not enroll all participants at one time point, and in  
480 many cases enrollment occurs slowly over the course of several years. We do not anticipate there will be  
481 major changes over the course of two academic years that would significantly alter the results compared  
482 to conducting the RCT in the same academic year, especially because students will be randomized within  
483 schools. Finally, staggering enrollment will give the research team the opportunity to troubleshoot any  
484 unanticipated issues with the first 3 participating schools.

485 At the completion of the year one screener/ screening process, school staff will be asked to complete  
486 the Feedback Guide document to assist in our research/ knowledge of the study process and  
487 procedures. Staff members from two schools completed the Feedback Guide interview as a pilot to  
488 ensure the final version of the Feedback Guide was thorough and comprehensive.

489 **7.2 Study Procedures**

490 **7.2.1 Enrollment**

491 Parents will be informed of their child's enrollment in screening and given the opportunity to opt  
492 out prior to the fall intervention. The opt out will be a letter sent home to parents (either via email or  
493 regular mail as per school preference) giving them the option to decline participation for their student.  
494 The study team will provide each school with unique study IDs to be assigned to every student, grades 9-  
495 12. Study IDs will include 8 numbers, the first two representing the school, the second two the grade  
496 and the remaining 4 will be unique to each participating student. Schools will be required to assign these  
497 unique study IDs to each student, grades 9-12. Schools will complete a linking list (spreadsheet  
498 template) ensuring that all students, grades 9-12 are included. A completed linking list will include  
499 student names (first and last), PASECURED ID, unique study ID and demographics information (grade,  
500 age, sex, race and ethnicity). Schools will remove student names and PASECUREID before sending the  
501 spreadsheet to the study team. *The full linking list (including student name and PASECUREDID) will*  
502 *remain on the school's spreadsheet and in the school's possession for tracking of study outcomes*  
503 *through the year.* By using a unique study ID for each student, the study team will never receive  
504 identifiable information of students. If a parent returns the opt-out form, school staff will still assign a

514 student a unique study ID but no demographic information will be included. This is so the study team  
515 may properly report the number of opt-out letters returned. This procedure ensures that students  
516 whose parents have opted-out are not tracked throughout the year.

517  
518 At the time of the actual universal screening students will also be provided the chance to opt out by  
519 clicking the appropriate opt out box on the iPad handed to them. We anticipate this will lead to study  
520 enrollment of 80% of eligible students. The first screen will describe PHQ-9 and that proceeding is  
521 voluntary. The completion of the PHQ-9 implies a student's voluntary consent to participate in the  
522 research. Unless the parent opt out is returned, participants in both arms will be followed through the  
523 school year for SAP triage, follow-up referrals and treatment engagement. Those students in the  
524 universal screening arm with PHQ-9 scores  $\geq 11$  (MDD screen positive) corresponding to moderate  
525 depressive symptoms, will proceed through the standard process for anyone referred by traditional  
526 means to a SAP triage interview. The student will either be referred to appropriate community or  
527 school-based treatment or SAP will determine no follow-up is needed. For those who are recommended  
528 to additional services by SAP, treatment engagement will be tracked per current SAP processes. The  
529 study team will receive individual level outcome data from the school district, containing no identifiable  
530 information.

531  
532 Additionally, we will recruit 1-2 school staff members to participate in our feedback guide interview  
533 upon completion of the screener/screening process year. We are not collecting any PHI, nor will names  
534 of the school staff participants be disclosed in the use of manuscripts/ written publications. Staff  
535 members from two schools were recruited and completed the Feedback Guide as a pilot to ensure the  
536 final version of the Feedback Guide was thorough and comprehensive.

### 537 538 **7.2.2 Randomization**

539 We will randomize by grade levels within each school to receive either one-time universal screening (via  
540 PHQ-9) or targeted screening (current SAP process). For the schools included in the study, half of the  
541 schools (50%) will be randomized such that students in 9th and 11th grades will receive universal  
542 screening and students in 10th and 12th grades will receive targeted screening, and the other half (50%)  
543 will be randomized such that students in 9th and 11<sup>th</sup> grades will receive targeted screening and  
544 students in 10th and 12th grades will receive universal screening. Randomization will be done only for  
545 students whose parents do not signal an unwillingness to participate in the study ("opt out"). Students  
546 and study personnel will not be blinded to randomized group at each school site. Randomization will be  
547 done by grade level primarily for pragmatic reasons because many PA health-based screenings are  
548 grade-specific (e.g. hearing screen in 11th grade) and screenings for a grade occur at the same time. The  
549 study will be conducted within schools, but it is not a cluster randomized study, in which an entire  
550 school (cluster) is assigned to one of the study groups. A cluster randomized study was considered but  
551 ultimately not pursued because randomization within schools controls for (1) within-school (community)  
552 factors that may contribute to higher or lower rates of SAP referral, (2) differences in school sizes, and  
553 (3) potential differences in rates of parental opt out among schools. These benefits were balanced  
554 against the concern of potential contamination between study groups, whereby those in the targeted  
555 screening group may benefit from the school-wide push to conduct universal screening.

### 556 557 **7.2.3 Universal MDD Screening Arm (Intervention – Treatment)**

558 Students randomized to the universal screening arm will complete a PHQ-9. This screening tool includes  
559 nine close-ended questions with a scoring system ranging from 0 to 27. The PHQ-9 screens will be  
560 administered on an iPad with an internet connection which allows direct entry of the results in REDCap.  
561 To prevent the duplication of unique study IDs, the study team will ensure all students have been  
562 assigned a unique study identification number prior to the screening. A list of participant IDs will be  
563 provided to the school member present during the screening. Once the unique study ID has been  
564 entered into REDCap, the study staff will give the iPad to the student to assent and complete the PHQ-9.  
565 This process will ensure that the correct study ID is used and prevent duplication of study IDs. Further,

566 this will safeguard against any student from participating whose parent returned the opt-out letter. No  
567 names or other identifying information will be used. Paper copies of the assent and PHQ-9 will be  
568 available as a backup should problems arise with internet connectivity. The same measures will be taken  
569 to ensure no names or other identifying information is used or collected.  
570

571 In order to immediately identify suicidal intent the survey will be set to flag positive questions in real  
572 time. When students have completed the PHQ-9 screen the REDCap survey will prompt them to hand  
573 the completed questionnaire to study staff, who will see a screen indicating a positive flag. Students  
574 with suicidal intent (question #9 any response besides "Not at all") will receive immediate evaluation  
575 and referral to emergency care as per current school protocols. PA schools are required to have a plan  
576 to address suicidal students (Act 71). A suicidal participant identified during the screening would not be  
577 allowed to leave the screening area unless accompanied by appropriate school or research staff. This  
578 student would then proceed through the standard school pathway for managing a student with  
579 intentions of self-harm. To ensure school staff is comfortable to manage a student in crisis and that this  
580 persists beyond the period of the grant, at least 5 staff per school in addition to at least 4 Penn State  
581 research staff will complete online evidence-based suicide prevention training (Question, Persuade, and  
582 Refer [QPR] Suicide Triage Training). In addition, all school crisis plans will be carefully reviewed with  
583 staff following the training to ensure the steps are realistic and staff is comfortable to execute the plan.  
584 The district identified, QPR trained staff member will be available at the time of screening. Study staff  
585 who are also QPR trained, will be present during the screening.  
586

#### 587 **7.2.4 Targeted Screening Arm (Current Process – Control)**

588 Students randomized to the targeted screening arm will complete their routine school-based screenings.  
589 Students will be followed through the academic year for SAP triage intakes initiated by the standard  
590 pathway (concern by teachers, nurse, parent, peer, or self-referral), any referrals and treatment  
591 engagement.  
592

#### 593 **7.2.5 Sharing Screening Results**

594 At 14 years of age, PA youth are eligible to consent to mental health services without parental consent,  
595 therefore, screening results will not be shared with parents. Those students with scores  $\geq 11$  (MDD  
596 screen positive) corresponding to moderate depressive symptoms will, however, proceed through the  
597 standard process for anyone referred by traditional means to a SAP triage interview. The student will  
598 either refer to appropriate community or school-based treatment or therapy (MDD identified) or SAP  
599 will determine no follow-up is needed. For those who are recommended to additional services by SAP,  
600 treatment engagement will be tracked per current SAP process. As per current school policy, students  
601 with suicidal feelings will receive immediate referral to emergency care and parents will be notified by  
602 the school.  
603

### 604 **7.3 Duration of Participation**

605 The student's participation is limited to the 5 minutes it takes for them to participate in the screening  
606 process.  
607

608 The school staff members who participate in the feedback guide interview is limited to the 45 minutes it  
609 takes for them to complete it.  
610  
611

## 612 **8.0 Subject Numbers and Statistical Plan**

### 613 **8.1 Number of Subjects**

614 The 9 HRSA funded schools to be included in the study have an estimated total enrollment of  
615 approximately 3,900 students. (the PCORI funded urban schools have a total enrollment of  
616

617 approximately 13,400 students). The overall rate of parental opt out is expected to be around 20%,  
618 resulting in approximately 13,840 students included in the study. We assumed a 15% attrition rate for  
619 students who move, drop out of school, or opt out later in the school year. This number will be finalized  
620 once we have a final confirmed list of participating schools. However, as the total number of students is  
621 greater than that originally projected below, the sample size determination section will be unchanged.  
622

## 623 **8.2 Sample size determination**

624 A total of 5,882 (estimated) students in each randomized group (an overall sample size of 11,764  
625 [estimated]) yields >99% statistical power to detect a difference of 3% versus 6% using a 2-sided test  
626 conducted at a Type I error rate of 5% in a mixed effect logistic regression model.  
627

## 628 **8.3 Statistical methods**

629 The principles of intention-to-treat (ITT) will be used for all statistical analyses related to primary and  
630 secondary aims. For the primary aim comparing universal to targeted screening, the statistical analysis  
631 will be conducted using a mixed effects logistic regression model. The primary outcome, MDD  
632 composite, will be an indicator whether a student was screen positive (or concerns raised in the  
633 targeted screening arm), identified as having MDD and subsequently engaged in treatment (1=yes,  
634 0=no). The model will include a fixed effect for randomized group (0=targeted screening, 1=universal  
635 screening) and a random effect for school. The random effect accounts for correlation among students  
636 enrolled within the same school. The primary parameter of interest will be the log odds of MDD  
637 composite in the universal screening group compared to the targeted screening group. Statistical  
638 significance of the log odds will be assessed using a 2-sided Wald test. Point estimates for the odds ratio  
639 along with a 95% confidence interval will be reported.  
640

641 For the analysis of Hypotheses 2 and 3 (Objective 1) evaluating universal screening and targeted  
642 screening by selected subgroups, the same mixed effects logistic regression modeling framework will be  
643 used, but the model will be extended by including a fixed effect for subgroup and an interaction effect  
644 for subgroup by randomized group. The interaction term will be the parameter of interest. A significant  
645 interaction term indicates that rates of MDD treatment engagement for universal versus targeted  
646 screening differ by subgroup level (e.g. female vs. male). For the secondary analyses (Objective 2) that  
647 evaluates universal screening and targeted screening based on school SAP data, we will have only 64  
648 total data points (4 grades in each of 16 schools). Mixed-effects linear (continuous outcomes) and  
649 logistic regression (binary outcomes) will be used, as appropriate, with a fixed effect for randomized  
650 group and a random effect for school. The parameter of interest will be the log odds for the universal  
651 compared to the targeted screening group. Due to the smaller sample size used for these outcomes,  
652 these analyses will be considered to be primarily hypothesis-generating. Potential mediating variables  
653 (socioeconomic status, ratio of guidance counselors to students and availability of school-based mental  
654 health services) will be evaluated for both the Objective 1 and 2 hypotheses.  
655

656 Additional secondary outcomes will include MDD screen results, MDD concern prompting Student  
657 Assistance Program triage, MDD identification and MDD treatment engagement analyzed individually  
658 (rather than as part of MDD composite). Finally any suicidal adolescents (suicidal thoughts [positive  
659 response to PHQ-9 item 9], attempts and completed) will be analyzed as a secondary outcome.  
660

661 We need to collect data for individuals for 3 main reasons. First, we expect approximately 20% of  
662 students to opt out from the study, with opt out rates varying by grade. Aggregate data would  
663 necessarily include outcomes for students who are not enrolled in the study. This is particularly  
664 problematic for the universal screening group because students who opt out will not be offered the  
665 depression screening tool (PHQ-9). Second, we need to obtain gender and race/ethnicity to conduct  
666 important planned secondary analyses (subgroup analyses) that will examine efficacy of universal  
667 screening by these groups. In particular, we expect that females and minority students will have much  
668 higher rates of major depression disorder identified in the universal screening group. Third, in the

universal screening group, we will be able to link responses to the PHQ-9 to outcomes, which will allow for estimation of important measures such as the false positive rate of the PHQ-9 (score  $\geq 11$ , but SAP process determines no further referrals are needed). These measures will inform decision-making regarding the potential for implementation of the intervention (in other schools) should the results of the trial ultimately show efficacy.

Efforts will be made to ensure completeness of data where possible, but missing data will occur for a number of anticipated reasons. First, a student may move during the course of the school year to another school district or drop out from school entirely. No data will be collected after this time point. Second, parents may opt out their child from the study at any time during the school year. Third, students who turn 18 during the school may decide to opt out of the study themselves. In both of these instances, data from SAP referrals that occur after opting out will not be collected for purposes of the study. Fourth, during the one-time universal screening phase, students may decide to leave data forms incomplete, including the PHQ-9. To decrease these instances, the PHQ-9 will be taken on an iPad program and the survey will alert if the form is left incomplete.

## 9.0 Confidentiality, Privacy and Data Management

Please see HRP-598 - Research Data Plan Review Form

## 10.0 Data and Safety Monitoring Plan

N/A: This study does not involve more than minimal risk to subjects, and the magnitude of harm/discomfort is not greater than that ordinarily encountered in daily life.

## 11.0 Risks

Risk involved in participating in this study are low aside from identification of a suicidal student, in which case measures are already currently in place in each school building to address.

## 12.0 Potential Benefits to Subjects and Others

### 12.1 Potential Benefits to Subjects

Potential benefit to subjects of positive screenings include a referral to SAP to receive support in managing their MDD.

### 12.2 Potential Benefits to Others

The potential public health impact of the proposed project cannot be overstated. MDD is a prevalent, disabling and a growing US public health problem. The problem is identified by national organizations focused on our country's health care priorities (Healthy People 2020, US Department of Health and Human Services). MDD leads both to functional impairment and higher rates of morbidity and mortality. In addition, MDD leads to significant social and economic consequences, including increased use of health resources and lost work productivity. A public health goal should include identification of those at risk for depression with the delivery of interventions to these individuals. Schools are a point of intervention with a high potential for early identification and prevention. Currently, fewer than 2 out of every 100 adolescents receives guideline-concordant major depression screening. We propose reaching nearly 80 of every 100 adolescents in the school setting, vastly increasing the identification of adolescents suffering from MDD with a goal to decrease both morbidity and mortality. Schools are an ideal partner for this approach, given their tremendous reach across the nation to nearly all adolescents.

713 **13.0 Sharing Results with Subjects**

714 Individual results will not be shared with other participants.

715 **14.0 Subject Stipend (Compensation) and/or Travel Reimbursements**

716 N/A  
717

718 **15.0 Economic Burden to Subjects**

719 **15.1 Costs**

720 There are no financial costs associated with participating in this research.  
721  
722

723 **15.2 Compensation for research-related injury**

724 N/A  
725

726 **16.0 Resources Available**

727 **16.1 Facilities and locations**

728 Screening will take place in each of the 4 school buildings previously identified for the 2018-2019 school  
729 year. The study team will submit a finalized list of schools in advance of the 2019-2020 screenings.  
730  
731

732 **16.2 Feasibility of recruiting the required number of subjects**

733 All 4 school districts for the 2018-19 year have already expressed interest in participating as evidenced  
734 through letters of support. Current relationships through past and present programming with the school  
735 districts created feasibility for recruitment.  
736

737 **16.3 PI Time devoted to conducting the research**

738 Dr. Sekhar will monitor the progress of the study during all phases and hold bi-weekly meetings with  
739 research staff.  
740

741 **16.4 Availability of medical or psychological resources**

742 It is not anticipated that medical or psychological resources will be needed on site, given that study  
743 procedures are minimal risk. However, students with suicidal intent will receive immediate evaluation  
744 and referral to emergency care as per current school protocols. PA schools are required to have a plan  
745 to address suicidal students. A QPR trained staff member will be available at the time of screening.  
746 Students with a PHQ-9 score  $\geq 11$  will proceed to Student Assistance Program triage as per the standard  
747 of care by which students exhibiting concerning behavior (outbursts, declining grades) would be  
748 referred for assessment.  
749

750 **16.5 Process for informing Study Team**

751 The investigators and project coordinator/study staff have completed their required Collaborative IRB  
752 Training Initiative (CITI) in the protection of human research subjects. The study team will be educated  
753 on the importance of confidentiality, and proper data handling and storage. Four study team members  
754 will also complete the Question, Persuade, Refer suicide triage training in order to assist the school staff  
755 as needed during the time of actual screening.  
756



757 **17.0 Other Approvals**

758 **17.1 Other Approvals from External Entities**

759 N/A

760 **17.2 Internal PSU Committee Approvals**

761 **Check all that apply:**

- 762
- 763  Anatomic Pathology – Hershey only – Research involves the collection of tissues or use of pathologic
- 764 specimens. Upload a copy of HRP-902 - Human Tissue For Research Form on the “Supporting
- 765 Documents” page in CATS IRB. This form is available in the CATS IRB Library.
- 766
- 767
- 768  Animal Care and Use – All campuses – Human research involves animals and humans or the use of
- 769 human tissues in animals
- 770
- 771  Biosafety – All campuses – Research involves biohazardous materials (human biological specimens
- 772 in a PSU research lab, biological toxins, carcinogens, infectious agents, recombinant viruses or DNA
- 773 or gene therapy).
- 774
- 775  Clinical Laboratories – Hershey only – Collection, processing and/or storage of extra tubes of body
- 776 fluid specimens for research purposes by the Clinical Laboratories; and/or use of body fluids that
- 777 had been collected for clinical purposes, but are no longer needed for clinical use. Upload a copy of
- 778 HRP-901 - Human Body Fluids for Research Form on the “Supporting Documents” page in CATS IRB.
- 779 This form is available in the CATS IRB Library.
- 780
- 781  Clinical Research Center (CRC) Advisory Committee – All campuses – Research involves the use of
- 782 CRC services in any way.
- 783
- 784  Conflict of Interest Review – All campuses – Research has one or more of study team members
- 785 indicated as having a financial interest.
- 786
- 787  Radiation Safety – Hershey only – Research involves research-related radiation procedures. All
- 788 research involving radiation procedures (standard of care and/or research-related) must upload a
- 789 copy of HRP-903 - Radiation Review Form on the “Supporting Documents” page in CATS IRB. This
- 790 form is available in the CATS IRB Library.
- 791
- 792  IND/IDE Audit – All campuses – Research in which the PSU researcher holds the IND or IDE or
- 793 intends to hold the IND or IDE.
- 794
- 795  Scientific Review – Hershey only – All investigator-written research studies requiring review by the
- 796 convened IRB must provide documentation of scientific review with the IRB submission. The
- 797 scientific review requirement may be fulfilled by one of the following: (1) external peer-review
- 798 process; (2) department/institute scientific review committee; or (3) scientific review by the Clinical
- 799 Research Center Advisory committee. NOTE: Review by the Penn State Hershey Cancer Institute
- 800 Scientific Review Committee is required if the study involves cancer prevention studies or cancer
- 801 patients, records and/or tissues. For more information about this requirement see the IRB website
- 802 at: <http://www.pennstatehershey.org/web/irb/home/resources/investigator>
- 803

804 **18.0 Multi-Site Research**

805 N/A

806 **19.0 Adverse Event Reporting**

807  
808 **19.1 Reporting Adverse Reactions and Unanticipated Problems to the Responsible IRB**  
809

810 In accordance with applicable policies of The Pennsylvania State University Institutional Review Board  
811 (IRB), the investigator will report, to the IRB, any observed or reported harm (adverse event)  
812 experienced by a subject or other individual, which in the opinion of the investigator is determined to be  
813 (1) unexpected; and (2) probably related to the research procedures. Harms (adverse events) will be  
814 submitted to the IRB in accordance with the IRB policies and procedures.  
815

816 **20.0 Study Monitoring, Auditing and Inspecting**

817  
818 **20.1 Auditing and Inspecting**  
819

820 The investigator will permit study-related monitoring, audits, and inspections by the Penn State quality  
821 assurance program office(s), IRB, the sponsor, and government regulatory bodies, of all study related  
822 documents (e.g., source documents, regulatory documents, data collection instruments, study data  
823 etc.). The investigator will ensure the capability for inspections of applicable study-related facilities  
824 (e.g., pharmacy, diagnostic laboratory, etc.).  
825

826 **21.0 Future Undetermined Research: Data and Specimen Banking**

827 N/A

828  
829 **21.1 Data and/or specimens being stored**

830 N/A

831  
832 **21.2 Location of storage**

833 N/A

834  
835 **21.3 Duration of storage**

836 N/A

837  
838 **21.4 Access to data and/or specimens**

839 N/A

840  
841 **21.5 Procedures to release data or specimens**

842 N/A

843  
844 **21.6 Process for returning results**

845 N/A  
846

847 **22.0 References**

848 1. Office of Disease Prevention and Health Promotion. Healthy People.gov. Mental Health  
849 and Mental Disorders. MNMD-4.1 Reduce the proportion of adolescents aged 12 to 17  
850 years who experience major depressive episodes.  
851 <https://www.healthypeople.gov/2020/data-search/Search-the-Data#objid=4813>; Updated  
852 December 11, 2017. Accessed December 11, 2017.

853 2. Avenevoli S, Swendsen J, He JP, Burstein M, Merikangas KR. Major depression in the  
854 national comorbidity survey-adolescent supplement: prevalence, correlates, and  
855 treatment. *J Am Acad Child Adolesc Psychiatry*. 2015;54(1):37-44.e2.

856 3. Heron M. Deaths: Leading causes for 2014. National Vital Statistics Reports. 2016;65(5).  
857 Hyattsville, MD: National Center for Health Statistics.  
858 [https://www.cdc.gov/nchs/data/nvsr/nvsr65/nvsr65\\_05.pdf](https://www.cdc.gov/nchs/data/nvsr/nvsr65/nvsr65_05.pdf). Accessed January 3, 2018.

859 4. Office of Disease Prevention and Health Promotion. Healthy People.gov. Mental Health  
860 and Mental Disorders. MHMD-11.2. Increase the proportion of primary care physician  
861 office visits where youth aged 12 to 18 years are screened for depression.  
862 <https://www.healthypeople.gov/2020/data-search/Search-the-Data#objid=4808>; Updated  
863 December 11, 2017. Accessed December 11, 2017.

864 5. Zenlea IS, Milliren CE, Mednick L, Rhodes ET. Depression screening in adolescents in  
865 the United States: a national study of ambulatory office-based practice. *Acad Pediatr*.  
866 2014;14(2):186-191.

867 6. Mojtabai R, Olfson M, Han B. National trends in the prevalence and treatment of  
868 depression in adolescents and young adults. *Pediatrics*. 2016;138(6):e20161878.

869 7. Forman-Hoffman V, McClure E, McKeeman J, et al. Screening for major depressive  
870 disorder in children and adolescents: A systematic review for the U.S. Preventive  
871 Services Task Force. *Ann Intern Med*. 2016;164(5):342-349.

872 8. Siu AL, US Preventive Services Task Force. Screening for depression in children and  
873 adolescents: U.S. Preventive Services Task Force recommendation statement. *Ann*  
874 *Internal Med*. 2016;164(5):360-366.

875 9. Adams SH, Park MJ, Twietmeyer L, Brindis CD, Irwin CE, Jr. Association Between  
876 Adolescent Preventive Care and the Role of the Affordable Care Act. *JAMA Pediatr*.  
877 2017 Nov 6. doi: 10.1001/jamapediatrics.2017.3140.

878 10. Pennsylvania House of Representatives. House Co-Sponsorship Memoranda. House of  
879 Representatives Session of 2015-2016 Regular Session.  
880 <http://www.legis.state.pa.us/cfdocs/Legis/CSM/showMemoPublic.cfm?chamber=H&Spi>  
881 [ck=20150&cosponid=20186](http://www.legis.state.pa.us/cfdocs/Legis/CSM/showMemoPublic.cfm?chamber=H&Spi). Published May 6, 2016. Accessed January 3, 2018.

882 11. Student Assistance Program FY 2015-2016. Mental Health-Drug and Alcohol Statistical  
883 Data. <https://sapjqs.org/uploadedfiles/JQRS%20Exec%20Summary%202015-16.pdf>.  
884 Accessed December 11, 2017.

885 12. Mercado MC, Holland K, Leemis RW, Stone DM, Wang J. Trends in Emergency  
886 Department Visits for Nonfatal Self-inflicted Injuries Among Youth Aged 10 to 24 Years  
887 in the United States, 2001-2015. *JAMA*. 2017;318(19):1931-1933.

888 13. Centers for Disease Control and Prevention. QuickStats: Suicide Rates for Teens Aged  
889 15-19 Years, by Sex – United States , 1975-2015. *MMWR Wkly Rep* 2017; 66(30):816.  
890 <https://www.cdc.gov/mmwr/volumes/66/wr/mm6630a6.htm>. Accessed December 11,  
891 2017.

892 14. National Alliance on Mental Illness. Depression. [http://www.nami.org/Learn-](http://www.nami.org/Learn-More/Mental-Health-Conditions/Depression)  
893 [More/Mental-Health-Conditions/Depression](http://www.nami.org/Learn-More/Mental-Health-Conditions/Depression). Accessed January 3, 2018.

894 15. Khoddam R, Jackson NJ, Leventhal AM. Internalizing symptoms and conduct problems:  
895 Redundant, incremental, or interactive risk factors for adolescent substance use during  
896 the first year of high school? *Drug Alcohol Depend*. 2016;169:48-55.

897 16. Fergusson DM, Woodward LJ. Mental health, educational, and social role outcomes of  
898 adolescents with depression. *Arch Gen Psychiat*. 2002;59(3):225-231.

899 17. Thapar A, Collishaw S, Pine DS, Thapar AK. Depression in adolescence. *Lancet*.  
900 2012;379(9820):1056-1067.

901 18. Thomas JF, Temple JR, Perez N, Rupp R. Ethnic and gender disparities in needed  
902 adolescent mental health care. *J Health Care Poor Underserved*. 2011;22(1):101-110.

903 19. Lau M, Hua L, Flores G. Racial/ethnic disparities in health and health care among US  
904 adolescents. *Health Serv Res*. 2012;47(5):2031-2059.

905  
906  
907  
908  
909

20. Irwin CE, Jr., Adams SH, Park MJ, Newacheck PW. Preventive care for adolescents: few get visits and fewer get services. *Pediatrics*. 2009;123(4):e565-572.
21. Dixon SK, Hoopes AJ, Benkeser D, Grigg A, Grow HM. Characterizing key components of a medical home among rural adolescents. *Journal Adolesc Health*. 2016;58(2):141-147.
